# Supplementary material
Source: MDPI journal article supplement (https://www.mdpi.com/2673-4133/3/3/22)
Supplement: s1 [file s1]

Archive with 2 entries (2 files):
- BeePOP+_supporting_info1.pdf
- BeePOP+_supporting_info2.pdf
